# Supplementary material for: Sequential Data Assimilation for Real-Time Probabilistic Flood Inundation Mapping
Source: Copernicus journal article supplement (doi:10.5194/hess-2021-181), 2021-05-18
Supplement: Supplementary file [file hess-2021-181-RC2-supplement.pdf]

6 \*Corresponding author: [kjafarzadegan@ua.edu](mailto:kjafarzadegan@ua.edu)

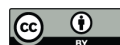

## 19 Abstract

20 Real-time probabilistic flood inundation mapping is crucial for flood risk warning and decision  
21 making during the emergency of an upcoming flood event. Considering high uncertainties  
22 involved in the modeling of a nonlinear and complex flood event, providing a deterministic flood  
23 inundation map can be erroneous and misleading for reliable and timely decision making. The  
24 conventional flood hazard maps provided for different return periods cannot also represent the  
25 actual dynamics of flooding rivers. Therefore, a real-time modeling framework that forecasts the  
26 inundation areas before the onset of an upcoming flood is of paramount importance. Sequential  
27 Data Assimilation (DA) techniques are well-known for real-time operation of physical models  
28 while accounting for existing uncertainties. In this study, we present a ~~Data Assimilation (DA)~~  
29 hydrodynamic modeling framework where multiple gauge observations are integrated into the  
30 LISFLOOD-FP model to improve its performance. This study utilizes the Ensemble Kalman Filter  
31 (EnKF) in a multivariate fashion for dual estimation of model state variables and parameters where  
32 the correlations among point source observations are taken into account. First, a synthetic  
33 experiment is designed to assess the performance of the proposed approach, then the method is  
34 used to simulate the Hurricane Harvey flood in 2017. Our results indicate that the multivariate  
35 assimilation of point-source observations into hydrodynamic models can improve the accuracy  
36 and reliability of probabilistic flood inundation mapping by 5-7%, while it also provides the basis  
37 for sequential updating and real-time flood inundation mapping.

38 **Keywords:** Data Assimilation; Probabilistic Flood Inundation Mapping; Hydrodynamic Model;  
39 Ensemble Kalman Filter

40

41

42

43

44

45



## 46 1. Introduction

47 The on-time, accurate, and reliable characterization of an upcoming flood event is imperative for  
48 proper decision making and risk analysis. A well-calibrated hydrologic model coupled with  
49 reliable weather forecast models can be used to generate the streamflow forecast (Clark and Hay,  
50 2004; Cuo et al., 2011; Habets et al., 2004). While streamflow forecasting during flood events is  
51 indispensable, the critical step for flood risk analysis is to estimate the flood inundation areas  
52 corresponding to the forecasted streamflow of a potential upcoming event. Hydrodynamic models  
53 are common tools used to simulate the physics of a river system and predict the spatiotemporal  
54 distribution of water surface elevation. The predicted water surface elevation can be simply  
55 converted to water depth and inundation area by overlaying with a high-resolution Digital  
56 Elevation Model (DEM) (Merwade et al., 2008; Teng et al., 2017).

57 According to the literature, most studies have analyzed the flood events for which the flood extent  
58 maps were available from surveying or satellite remote sensing. These studies include but are not  
59 limited to, calibration and assimilation of hydrodynamic models (Baldassarre et al., 2009; García-  
60 Pintado et al., 2013; Gobeyn et al., 2017; Hostache et al., 2009; Lai et al., 2014; Pappenberger et  
61 al., 2007; Rahman and Thakur, 2018; Tarpanelli et al., 2013). Depending on the ~~research~~  
62 objectives, such studies are crucial as they address important theoretical questions and advance the  
63 flood modeling task. For example, several studies have used satellite remote sensing data, such as  
64 Synthetic Aperture Radar (SAR) images, to find the sensitivity of hydrodynamic models to their  
65 parameters, compare calibration strategies and test the application of assimilating remote sensing  
66 data into these models (Di Baldassarre et al., 2009; Hunter et al., 2005; Mason et al., 2009; Matgen  
67 et al., 2010). Since floods happen in a short period and at a certain location, it is ~~most~~ often not  
68 possible to find an appropriate remote sensing image that covers those inundated areas during the



69 flood period. This is the main reason that research on flood inundation mapping is mostly limited  
70 to post-event analysis where specific study areas with available remote sensing data are used as  
71 testbeds.

72 Federal Emergency Management Agency (FEMA) is the leading agency in the United States that  
73 provides flood hazard and risk maps over the Contiguous United States (CONUS). These maps  
74 display the flood-prone areas corresponding to specific return periods (e.g. 100 and 500-year  
75 events). While the FEMA flood hazard and risk maps provide general information about risk areas,  
76 they are not always reliable for an upcoming flood event with different return periods. For  
77 example, FEMA 100-year and 500-year flood hazard maps covered only one-third and half of the  
78 inundated areas induced by Hurricane Harvey in Harris County, Texas, respectively (Pinter et al.,  
79 2017). The National Water Center Innovators Program proposed the idea of real-time flood  
80 inundation mapping across the United States in 2015 (Maidment, 2017). It highlighted the  
81 importance of event-based flood inundation mapping where a model uses the forecasted river  
82 discharge to estimate the inundation areas corresponding to a specific flood just before the onset  
83 of the event. Compared to the traditional flood hazard mapping, real-time flood inundation  
84 mapping is more informative and beneficial for emergency response-related decision-making.

85 In real-time flood inundation mapping, the model takes advantage of forecasted forcing data and  
86 generates inundation areas corresponding to an upcoming flood event. Providing these maps ahead  
87 of time is extremely valuable for building a robust flood warning system. Data assimilation (DA)  
88 is an effective approach commonly used to improve the performance of real-time hydrologic  
89 forecasting by updating the model state variables and parameters when new observation becomes  
90 available (Moradkhani et al., 2019). The integration of DA with physical models is highly  
91 advantageous as it enables accounting for different sources of uncertainties involved in model



92 predictions. These include (1) forcing data uncertainty due to the limitation of measurements and  
93 spatiotemporal representativeness of the data (Alemohammad et al., 2015; Kumar et al., 2017), (2)  
94 parameter uncertainty due to equifinality and non-uniqueness of parameters (Abbaszadeh et al.,  
95 2018; Leach et al., 2018), (3) model structural uncertainty due to the imperfect representation and  
96 conceptualization of a real system (Abbaszadeh et al., 2019; Pathiraja et al., 2018; Zhang et al.,  
97 2019) and (4) initial and boundary condition uncertainty (DeChant and Moradkhani, 2014; Lee et  
98 al., 2011).

99 Probabilistic forecasting and uncertainty quantification using DA have been the core of modeling  
100 in the atmospheric and oceanic sciences (e.g. Anderson and Anderson, 1999; Courtier et al., 1993).  
101 Later, the hydrologic community started to utilize this approach to account for the uncertainties  
102 involved in different layers of model predictions and provide more accurate and reliable model  
103 estimates such as soil moisture (Pauwels et al., 2001; Reichle et al., 2002), streamflow  
104 (Moradkhani et al., 2005a; Vrugt et al., 2006), snow (Sheffield et al., 2003; Slater and Clark, 2006)  
105 and so many other variables. Despite these advances in hydrologic studies, the application of data  
106 assimilation in conjunction with hydrodynamic models has received little attention in the literature.  
107 The characterization of uncertainty in hydrodynamic models for probabilistic flood inundation  
108 mapping has been mostly limited to conventional techniques, such as ~~random~~ Monte Carlo  
109 sampling (Domeneghetti et al., 2013; Neal et al., 2013; Pedrozo-Acuña et al., 2015; Purvis et al.,  
110 2008) and Generalized Likelihood Uncertainty Estimation (GLUE) (Aronica et al., 2002a;  
111 Romanowicz and Beven, 2003).

112 The effectiveness and application of assimilating remotely sensed data (e.g. Soil Moisture Active  
113 Passive (SMAP)) into hydrologic models have been vastly investigated in the literature  
114 (Abbaszadeh et al., 2020; Azimi et al., 2020; Lievens et al., 2017). However, given the small scale

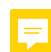



115 of the hydrodynamic modeling process, the spatiotemporal resolution of current satellite products  
116 is not adequate for assimilating into these models. To properly estimate the flood inundation  
117 extent, a spatial resolution less than river width (e.g. 100 m) is recommended. In addition, due to  
118 the short duration of floods, satellite data with daily revisit time is needed. Since remote sensing  
119 products do not provide such high spatiotemporal resolution data for hydrodynamic models, the  
120 research on hydrodynamic data assimilation is limited in the literature. Due to the coarse spatial  
121 resolution of satellites that provide water surface elevation data, some studies have limited their  
122 analyses to large rivers with a width of above 1 km (e.g. study of Nile and Amazon) (Brêda et al.,  
123 2019). However, since the width of the majority of rivers is less than 100 meters, these studies  
124 cannot be practically used in many regions. Several studies used higher resolution synthetic  
125 SWOT data to evaluate the performance of assimilation techniques (Durand et al., 2008; Munier  
126 et al., 2015; Pedinotti et al., 2014; Yoon et al., 2012). While these works provided important  
127 information about the assimilation of satellite data into hydrodynamic models, their applications  
128 are only limited to synthetic experiments, making them impractical for real case studies. Some  
129 studies have implemented indirect methods to estimate WSE from flood extents generated by high-  
130 resolution SAR satellite data (Giustarini et al., 2011; Hostache et al., 2010; Matgen et al., 2010b;  
131 Neal et al., 2009). This approach can provide high-resolution data that is suitable for the majority  
132 of rivers. However, the reliability of this data is concerning because the methods used to convert  
133 the flood extent to WSE pose additional errors which downgrades the quality of the final observed  
134 data for assimilation practices. Besides these issues, the major drawback of remote sensing data  
135 assimilation pertains to their coarse temporal resolutions. To efficiently monitor the flood  
136 dynamics, the assimilation process should be performed at a daily/hourly time scale, however, the  
137 revisit frequency of satellites used for capturing the water surface elevation ranges from a week to



138 a month. Therefore, there is a significantly low chance to capture multiple real-time remote sensing  
139 images for the majority of inundated catchments during flood events. In the most optimistic  
140 scenario, assimilation of satellite data is only limited to one/two updates during the simulation  
141 period ~~which~~ may not be sufficient for reliable probabilistic flood inundation mapping.

142 Application of DA in hydrodynamic modeling can be either river monitoring or flood inundation  
143 mapping. The goal of hydrodynamic data assimilation for river monitoring is to track variations in  
144 the channel roughness and bathymetry in the long run. Therefore, the weekly/monthly satellite  
145 data can be well assimilated into the models as the channel characteristics do not change on a daily  
146 basis. On the other hand, flood inundation mapping needs an hourly/~~daily~~ track of WSE because  
147 floods happen rapidly and affect the river dynamics on a short time-scale. The literature indicates  
148 those studies that assimilated data into hydrodynamic models have been mostly designed for river  
149 monitoring (Brêda et al., 2019; Durand et al., 2008; Yoon et al., 2012b). To capture the daily  
150 dynamics of ~~the~~ rivers for real-time flood inundation mapping, the discharge and water stage  
151 values measured at the gauge stations can be assimilated into the hydrodynamic models. Xu et al.,  
152 (2017) performed a Particle Filtering (PF) approach to assimilate the water stage data from six  
153 gauges into a hydrodynamic model. ~~In order~~ to calculate the particle weights in the filtering  
154 process, they assumed that gauge observations are independent. In this study, however, we  
155 consider interconnections among the gauge stations and apply multivariate Ensemble Kalman  
156 Filter (EnKF) to a **2D** hydrodynamic model for better characterization and quantification of  
157 uncertainty and further improving the accuracy of model simulations.

158 Advancing the probabilistic hydrodynamic modeling with DA techniques is a necessary step to fill  
159 the gap between hydrology and hydrodynamics. To address this problem, this study aims to  
160 explore the capability of a standard sequential DA technique, namely the EnKF, for real-time



161 probabilistic flood inundation mapping. The past studies that used DA in conjunction with  
 162 hydrodynamic models have mostly focused on the quantification of uncertainty in one or two  
 163 hydrodynamic variables (e.g. Giustarini et al., (2011) and Hostache et al., (2018) only investigated  
 164 the uncertainty in the upstream flow and rainfall respectively; Yoon et al., (2012) focused on the  
 165 uncertainty of river bathymetry while ignoring the roughness parameter uncertainty). In addition,  
 166 the main application of DA-hydrodynamic modeling framework has been in river monitoring at  
 167 long-term or water stage forecasting during the flood events (Brêda et al., 2019; Matgen et al.,  
 168 2010; Xu et al., 2017). However, this study takes one step further and proposes a DA-  
 169 hydrodynamic modeling framework for real-time probabilistic flood inundation mapping while  
 170 accounting for all sources of uncertainties involved in the model simulations. These include  
 171 hydrodynamic model parameters (channel roughness and river bathymetry) uncertainty, forcing  
 172 data (river boundary conditions) uncertainty, and state variable (water depth) uncertainty.  
 173 Additionally, unlike past works that assimilated either discharge or water stage into the  
 174 hydrodynamic model, this study performs a multivariate DA to incorporate the observed values of  
 175 both variables into the hydrodynamic model for a reliable simulation of flooding and its  
 176 corresponding inundation area.

## 177 2 Data and Study area

178 In this study, we simulate the Hurricane Harvey flood, one of the worst natural disasters in the  
 179 history of the United States that caused more than 120 billion in damage  
 180 ([https://www.nhc.noaa.gov/data/tcr/AL092017\\_Harvey.pdf](https://www.nhc.noaa.gov/data/tcr/AL092017_Harvey.pdf)). The Harvey storm hit Texas on  
 181 August 25, 2017, caused massive precipitation for six continuous days and resulted in extreme  
 182 flooding condition in Houston and surrounding areas. Given the considerable uncertainties in  
 183 hydrologic and hydrodynamic processes of such an extreme flood, a deterministic modeling





184 approach with fixed inputs provides erroneous simulations that are highly different from  
185 observations. To account for the uncertainties involved in different layers of flood simulation, this  
186 study implements a DA-hydrodynamic modeling framework and provides probabilistic flood  
187 inundation maps.

188 Figure 1.a shows the study area that consists of four main channels (blue lines) and eight tributaries  
189 (red lines). The upstream and downstream boundary conditions (purple points) are provided from  
190 daily streamflow in four USGS gauges ((#08068090, # 08068500, #08068740, #08068780) and  
191 water stage time series at the downstream gauge (#08069500). The daily streamflow discharge in  
192 two internal gauges (green points #08068800 and #08069000) and water stage time series in the  
193 second internal gauge are the observations that will be assimilated into the LISFLOOD-FP model.  
194 Figures 1.b and 1.c present the geographic location of the study area within the state of Texas and  
195 San Jacinto watershed, respectively. To set up the LISFLOOD-FP model, we use a DEM with 120  
196 m spatial resolution. Such a coarse resolution DEM alleviates the computational intensity of the  
197 proposed probabilistic hydrodynamic modeling framework. It should be noted that the subgrid  
198 solver used for simulation of flood has the advantage of accepting narrow rivers with a width of  
199 less than 120 m while the cell sizes are 120 m. In this study, the DA-hydrodynamic modeling  
200 framework is parallelized and performed on the University of Alabama High-Performance  
201 Computing (UAHPC) cluster.

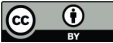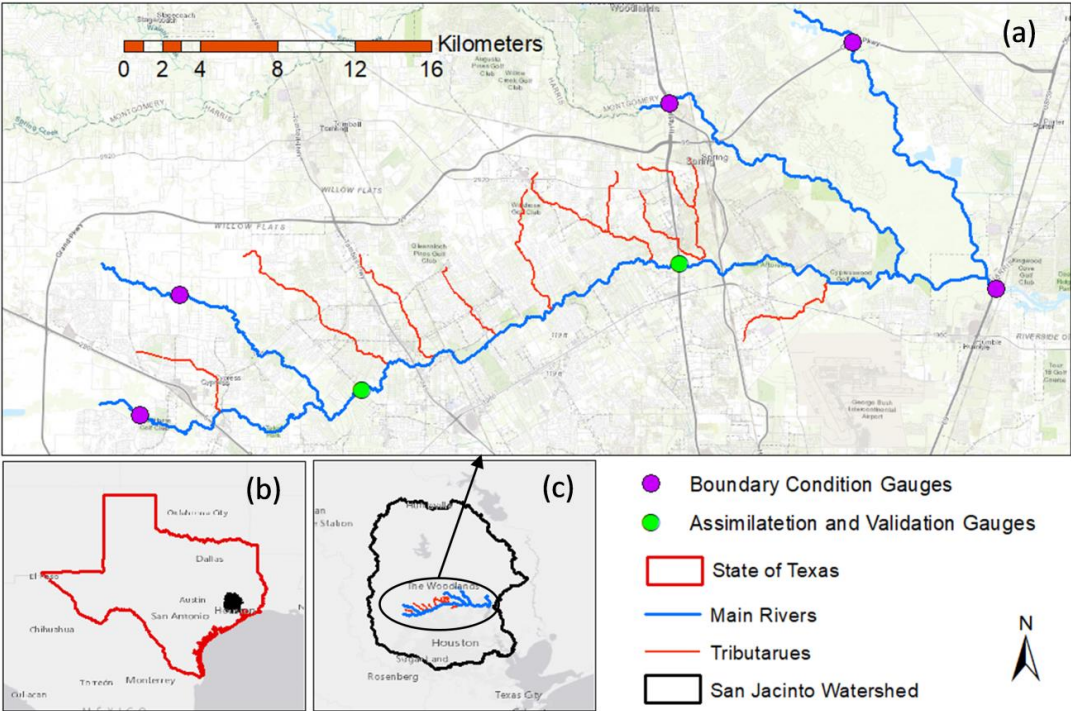

Figure 1 (a) Study area with all gauges, rivers, and tributaries. (b) Geographic location of San Jacinto Watershed within the state of Texas. (c) Geographic location of the study area within San Jacinto watershed (© NhDplus and USGS).

### 3. Methods

#### 3.1 Flood inundation model

The flood inundation model used in this study is LISFLOOD-FP (Bates and De Roo, 2000), a raster-based 2D hydrodynamic model that simulates the spatiotemporal distribution of water surface elevation over the study area. The model solves the momentum and continuity equations (Saint Venont equations):

$$\frac{\partial Q}{\partial x} + \frac{\partial A}{\partial t} = 0 \quad (1)$$



$$\frac{1}{A} \frac{\partial A}{\partial t} + \frac{1}{A} \frac{\partial (\frac{Q^2}{A})}{\partial x} + g \frac{\partial h}{\partial x} - g(S_0 - S_f) = 0 \quad (2)$$

where  $Q$  is the flow rate at a given cross-section with the area of  $A$  in the main channel,  $x$  denotes the location along the channel,  $t$  represents time,  $S_0$  and  $S_f$  are channel bed and friction slopes, and  $g$  is the gravitational acceleration.

We use the sub-gird channel solver, the most recently developed numerical scheme that considers friction and water slope as well as local acceleration components in the shallow water equations (Neal et al., 2012). This solver is advantageous for large-scale and efficient modeling as it utilizes coarse resolution DEMs along with channel width values that are smaller than DEM resolution. Since DA-hydrodynamic modeling requires hundreds of model simulations, a computationally intensive operation, this solver helps reduce the computational burden and enables implementing probabilistic flood inundation mapping within a DA framework. To set up the model, we assume rectangular cross-section areas and a uniform roughness for both channel and floodplain. Given the low sensitivity of LISFLOOD-FP to the floodplain roughness (Hall et al., 2005), this parameter is assumed a constant value. However, the channel roughness is the only model roughness parameter whose associated uncertainty is accounted for within the assimilation framework. We also consider the uncertainty of bathymetry by defining an offset parameter that uniformly lowers the DEM values of the river channels. In addition to model parameters (channel roughness and bathymetry), the upstream and lateral fluxes entered the river system as the boundary conditions of the model are other main sources of uncertainty in the assimilation framework.

The upstream boundary conditions are generated from four USGS gauge stations (Figure. 1). To estimate the lateral fluxes, we calculate the deficit in the system as subtraction of the upstream from downstream flows and then, distribute the deficit among river tributaries based on their

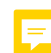

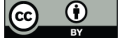

235 drainage areas (~~Please~~ refer to Jafarzadegan et. al (2021) for detailed information about the  
 236 calculation of lateral flows in this study area). In section 3.3, we ~~will~~ further discuss the procedure  
 237 we used to initialize the model parameters and river boundary conditions.

### 238 **3.2 Ensemble Kalman Filter (EnKF)**

239 (~~Moradkhani et al., 2005b~~) provided a comprehensive description of the EnKF formulation for  
 240 dual estimation of state and parameters in hydrologic models. Here we briefly describe the EnKF  
 241 formulation for multivariate assimilation of point source water stage and discharge data into a  
 242 hydrodynamic model. For a more effective assimilation process, both types of interconnections  
 243 between observations, namely spatial correlation of a single observation (discharge or water stage)  
 244 among different gauges ~~as well as~~ the correlation between both observations at a single gauge are  
 245 taken into account in the EnKF equations. ~~In this study,~~ EnKF is used to simultaneously estimate  
 246 model states and parameters. For this purpose, the parameters should be treated similar to the state  
 247 variables with a difference that parameter evolution is generated artificially.

248 ~~Let's~~ assume a DA-hydrodynamic modeling framework with  $l$  parameters ( $p = 1, 2, \dots, l$ ),  $m$  states  
 249 ( $s = 1, 2, \dots, m$ ) and  $n$  observations ( $j = 1, 2, \dots, n$ ). The following EnKF equations are described  
 250 in accordance with the flowchart shown in Figure 2. In the EnKF, parameter samples can be  
 251 generated by adding the noise of  $\eta_t$  with covariance  $\Sigma_t^\theta$  to the prescribed parameters.

$$252 \quad \theta_{t+1}^{i-} = \theta_t^{i+} + \tau_t^i \quad \tau_t^i \sim N(0, \eta_{t+1}) \quad \forall \quad \eta_{t+1} = \Sigma_{t+1}^\theta \quad (3)$$

253 Using  $\theta_{t+1}^{i-}$  and forcing data, a model state ensemble and predictions are generated, respectively.

$$254 \quad x_{t+1}^{i-} = f(x_t^{i+}, u_t^i, \theta_{t+1}^{i-}) + \omega_t^i \quad \omega_t^i \sim N(0, Q_t) \quad \forall \quad Q_t = \Sigma_t^x \quad (4)$$

$$255 \quad \hat{y}_{t+1} = h(x_{t+1}^{i-}, \theta_{t+1}^{i-}) + v_{t+1}^i \quad v_{t+1}^i \sim N(0, R_{t+1}) \quad \forall \quad R_{t+1} = \Sigma_{t+1}^y \quad (5)$$

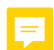

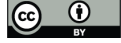

where  $x_t$ ,  $u_t$ ,  $\theta_t$  and  $y_t$  are the vector of the uncertain state variables, forcing data, model parameters and observation data at time step  $t$ , respectively.  $\omega_t$  represents the model errors due to the imperfect model, and  $v_t$  is the measurement error. Most often,  $\omega_t$  and  $v_t$  are assumed to be white noises with mean zero and covariance  $Q_t$  and  $R_t$ , respectively. In addition, the two noises  $\omega_t$  and  $v_t$  are assumed to be independent.

Then we update the parameter ensemble members using the standard Kalman filter equation:

$$\theta_{t+1}^{i+} = \theta_{t+1}^{i-} + K_{t+1}^{\theta} (y_{t+1}^i - \hat{y}_{t+1}^i) \quad (6)$$

where  $K_{t+1}^{\theta} \in \mathbb{R}^{l \times n}$  is the Kalman gain matrix for correcting the parameter trajectories and is obtained by:

$$K_{t+1}^{\theta} = \Sigma_{t+1}^{\theta y} [\Sigma_{t+1}^{yy} + R'_{t+1}]^{-1} \quad (7)$$

where  $\Sigma_{t+1}^{\theta y} \in \mathbb{R}^{l \times n}$  is the cross-covariance matrix of parameter ensemble and prediction ensemble (Eq. 6). Unlike other studies, and for more realistic characterization of observation and model errors here the correlation between the errors associated with  $n$  observation data are accounted for during the assimilation process. Therefore, the covariance matrix  $R'_t \in \mathbb{R}^{n \times n}$  is a nonzero matrix, such that the values in the diagonal represent the error associated with each observation data and all elements lower/upper the main diagonal denote the cross covariance between different observations (Eq. 7).  $\Sigma_t^{yy} \in \mathbb{R}^{n \times n}$  is also a similar covariance matrix with the inclusion of error correlation between the model simulations (Eq. 8).

$$\Sigma_{t+1}^{\theta y}(p, j) = \frac{1}{N} \sum_{i=1}^N [(\theta_{t+1}^{i-}(p) - E[\theta_{t+1}^-(p)])(\hat{y}_{t+1}^i(j) - E[\hat{y}_{t+1}(j)])] \quad (8)$$

$$R'_{t+1}(j, j') = \begin{cases} R_{t+1} & j = j' \\ \frac{1}{N} \sum_{i=1}^N [(y_{t+1}^i(j) - E[y_{t+1}(j)])(y_{t+1}^i(j') - E[y_{t+1}(j')])] & j \neq j' \end{cases} \quad (9)$$

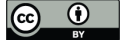

$$\Sigma_{t+1}^{yy}(j, j') = \frac{1}{N} \sum_{i=1}^N [(\hat{y}_{t+1}^i(j) - E[\hat{y}_{t+1}(j)])(\hat{y}_{t+1}^i(j') - E[\hat{y}_{t+1}(j')])] \quad (10)$$

$$E[\theta_{t+1}^-] = \frac{1}{N} \sum_{i=1}^N \theta_{t+1}^{i-} \quad (11)$$

$$E[\hat{y}_{t+1}] = \frac{1}{N} \sum_{i=1}^N \hat{y}_{t+1}^i \quad (12)$$

Now using the updated parameter, the new model state trajectories (state forecasts) and prediction trajectories are generated:

$$x_{t+1}^{i-} = f(x_t^{i+}, u_t^i, \theta_{t+1}^{i+}) + \omega_t^i \quad \omega_t^i \sim N(0, \Sigma_t^x) \quad \forall \quad Q_t = \Sigma_{t+1}^x \quad (13)$$

$$\hat{y}_{t+1}^i = h(x_{t+1}^{i-}, \theta_{t+1}^{i+}) + v_{t+1}^i \quad v_{t+1}^i \sim N(0, \Sigma_{t+1}^y) \quad \forall \quad R_{t+1} = \Sigma_{t+1}^y \quad (14)$$

Model states ensemble is similarly updated as follows:

$$x_{t+1}^{i+} = x_{t+1}^{i-} + K_{t+1}^x (y_{t+1}^i - \hat{y}_{t+1}^i) \quad (15)$$

$$y_{t+1}^i = y_{t+1}^{i-} + v_{t+1}^i \quad v_{t+1}^i \sim N(0, R_{t+1}) \quad \forall \quad R_{t+1} = \Sigma_{t+1}^y \quad (16)$$

where  $K_{t+1}^x \in \mathbb{R}^{m \times n}$  is the Kalman gain for correcting the state trajectories and is obtained by:

$$K_{t+1}^x = \Sigma_{t+1}^{xy} [\Sigma_{t+1}^{yy} + R_{t+1}']^{-1} \quad (17)$$

where  $\Sigma_{t+1}^{xy} \in \mathbb{R}^{m \times n}$  is the cross-covariance matrix of states ensemble and prediction ensemble (Eq. 16).

$$\Sigma_{t+1}^{xy}(s, j) = \frac{1}{N} \sum_{i=1}^N [(x_{t+1}^{i-}(s) - E[x_{t+1}^-(s)])(\hat{y}_{t+1}^i(j) - E[\hat{y}_{t+1}(j)])] \quad (18)$$

$$E[x_{t+1}^-] = \frac{1}{N} \sum_{i=1}^N x_{t+1}^{i-} \quad (19)$$

In this study, the water depth along the channel is the only state variable ( $m=1$ ). The channel roughness and bathymetry are two model parameters ( $l=2$ ) and three point source observations,



including water discharge at gauge 1 and 2 as well as water stage at gauge 2 ( $n=3$ ) are assimilated into the LISFLOOD-FP model (Table 1). Therefore, the Kalman gains used to update the model parameters and states (Eqs 5 and 15) are  $2 \times 3$  and  $1 \times 3$  matrices that take advantage of a multivariate point source assimilation while considering the downstream correlation between discharge observations and the correlation between water stage and discharge at gauge 2. **3.3.**

## Experimental design

~~The ultimate goal of this study is to simulate the Hurricane Harvey flood and generate probabilistic flood inundation maps through the DA-hydrodynamic modeling framework.~~ Figure. 1 illustrates the flowchart of the proposed probabilistic flood inundation mapping approach. ~~In this study,~~ the EnKF is performed based on an ensemble size of 100. The boundary conditions including four upstream flows, seven lateral fluxes, and downstream flows are perturbed with adding white noises sampled from a normal distribution with a mean zero and relative error of 20%. The errors are assumed heteroscedastic meaning that their values are proportional to the flow magnitude. To characterize uncertainty in the initial condition, namely water depth, we add a white noise with a mean zero and standard deviation of 1 meter. In this study, using the proposed EnKF-based multivariate assimilation approach, three point-scale observations, i.e., discharge at USGS gauges 1 and 2, as well as water stage at gauge 2, are incorporated into the LISFLOOD-FP model to rectify its state variables and parameters, and hence provide more accurate and reliable flood inundation maps. All these three observations are perturbed by adding a normally distributed white noise with a mean zero and a relative error of 20%. First, the LISFLOOD-FP model is forced with the upstream, downstream and lateral flow ensembles. To initialize the state variables in the system, the simulated water depth values at the ending day of the warm-up period (the initial condition for the first day of the model simulation) are perturbed with adding a white noise with a mean zero

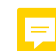



317 and standard deviation of 1 meter. The model parameters (i.e., channel roughness and bathymetry)  
318 are initialized using the Latin Hypercube Sampling method and evolved during the assimilation  
319 process. The ensemble of water depth values predicted by the model for the next time step together  
320 with observations, namely water stage and discharge at gauges are used in the multivariate Kalman  
321 equation to update the model parameters. The LISFLOOD-FP model is run for the second time  
322 with the updated parameters and the second multivariate Kalman equation uses the predicted water  
323 depth with observations to update the ensemble of water depth in the system. The ensemble of  
324 updated water depth (state), bathymetry, and channel roughness (parameters) ~~will be used within~~  
325 the LISFLOOD-FP to predict an ensemble of water depth for the next time step. The predicted  
326 water depth is simply converted to a probabilistic flood inundation map. Using this data  
327 assimilation framework, we can generate 1-day forecast of probabilistic flood inundation maps  
328 which would be highly beneficial for real-time flood warning and decision making. It is worth  
329 mentioning that the forecasted probabilistic maps account for different sources of uncertainty,  
330 including the forcing data (boundary condition flows), model parameters (channel roughness and  
331 bathymetry), and initial conditions (water depth).

332 The simulation period of the LISFLOOD-FP model is set up for 45 days from July-30-2017 to  
333 Sep-12-2017 and the entire month of July is used as a warm-up period. The water depth generated  
334 for the end of July ~~will be~~ used as the initial condition of the model. To account for the uncertainty  
335 of channel roughness and bathymetry, we sample ~~them~~ from uniform distributions ranging from  
336 [0,0.1] and [39,42] m, respectively. The bathymetry parameter is the elevation of ~~the~~ channel bed  
337 at the upper location of the channel. The offset parameter is calculated by subtracting this value  
338 from DEM at the upper location. Then, the bathymetry vector that includes the channel bed  
339 elevation for all channel cells is generated by subtracting the offset from DEM values along the

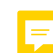



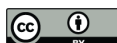

channel. It should be noted that the range of uniform distribution is chosen based on previous studies (Aronica et al., 2002b; Bales and Wagner, 2009; Di Baldassarre et al., 2009; Horritt, 2006; Pappenberger et al., 2008), expert judgment, and trial-and-error.

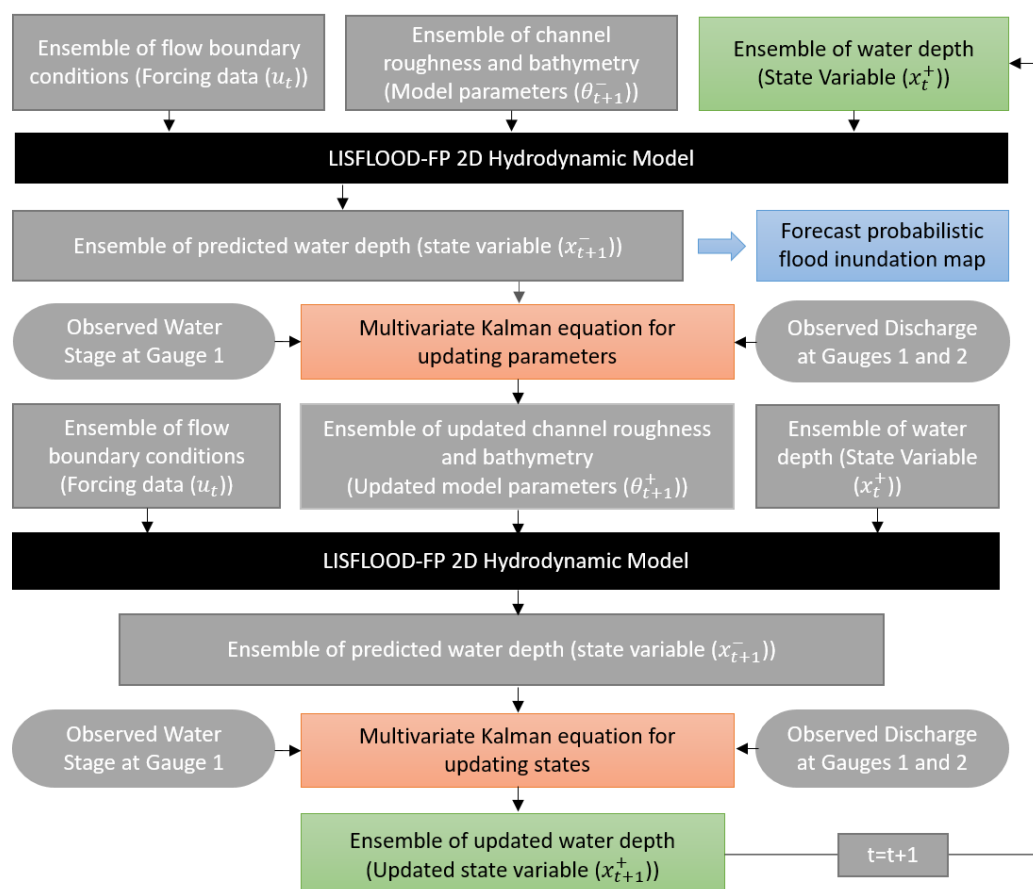

343

344 *Figure 2. Schematic of the DA-hydrodynamic modeling framework for real-time probabilistic*  
 345 *flood inundation mapping. The green boxes represent the state variables where their updated*  
 346 *values are fed into the LISFLOOD-FP model and provide a probabilistic flood inundation map*  
 347 *at the forecast mode (blue box). The black boxes highlight the physical model and the orange*  
 348 *boxes represent the Kalman equations used for updating the parameter and state variables by*  
 349 *the EnKF.*

350 To assess the effectiveness and robustness of the proposed assimilation framework for  
 351 probabilistic flood inundation mapping, we design three different experiments. First, an open-loop



(OL) simulation is established where the model is run without assimilation. In the second experiment, we perform DA-hydrodynamic modeling on a synthetic case study where we assume the model is perfect and has no error. In this approach, we set the model parameters (channel roughness and bathymetry), initial state (water depth) and boundary condition flows to fixed values and run the model to generate discharge and water surface elevation across the gauges within the study area. These predicted values are assumed as benchmark observations. This synthetic analysis ensures that the assimilation process performs well and the model parameters end up converging to predefined values. In the next step, we implement the proposed assimilation framework on a real case study where the observed discharge and ~~water surface elevation~~ data that are recorded from the USGS gauges during Hurricane Harvey, are assimilated into the model. Considering the severe flood condition during the Hurricane, we aim to investigate the extent to which the multivariate DA-Hydrodynamic modeling framework improves the model simulation and flood inundation mapping skill.

### 3.4 Validation strategy

As mentioned before, the convergence of uncertain model parameters toward truth in the synthetic experiment demonstrates the performance of DA-hydrodynamic modeling framework. To provide a robust analysis of each assimilation run, it is necessary to assess the model performance through multiple deterministic (KGE and RMSE) and probabilistic (NRR and Reliability) measures. The summary of performance measures used in this study is tabulated in Table 1.

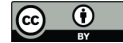

Table 1: Summary of performance measures used in this study

| Performance Measure                              | Mathematical Representation                                                                                                                                                                                                                  |
|--------------------------------------------------|----------------------------------------------------------------------------------------------------------------------------------------------------------------------------------------------------------------------------------------------|
| Kling-Gupta Efficiency<br>(KGE)                  | $1 - \sqrt{\left(\left(\frac{\text{Cov}_{y_t y'_t}}{\sigma \sigma'}\right) - 1\right)^2 + \left(\left(\frac{\sigma'}{\sigma}\right) - 1\right)^2 + \left(\left(\frac{\mu'}{\mu}\right) - 1\right)^2}$                                        |
| Root Mean Square Error<br>(RMSE)                 | $\sqrt{\frac{1}{T} \sum_{t=1}^T (y'_t - y_t)^2}$                                                                                                                                                                                             |
| Normalized Root-Mean-Square Error Ratio<br>(NRR) | $\sqrt{\frac{1}{T} \sum_{t=1}^T (y_t - \overline{y'_{\bullet,t}})^2} \times \left( \frac{1}{T} \left\{ \sum_{t=1}^T \left[ \frac{1}{T} \sum_{t=1}^T (y_t - \overline{y'_{\bullet,t}})^2 \right] \right\} \sqrt{\frac{N+1}{2N}} \right)^{-1}$ |
| Reliability                                      | $1 - \frac{2}{T} \sum_{t=1}^T \left  \frac{Z_t}{T} - U_t \right $                                                                                                                                                                            |

375

376  $y_t$  and  $y'_t$  are the observed and simulated values, respectively. The Kling–Gupta Efficiency (KGE)  
 377 varies from  $-\infty$  to 1, such that a value of 1 indicates a perfect fit between observed and simulated  
 378 values. The pairs of  $(\mu, \sigma)$  and  $(\mu', \sigma')$  represent the first two statistical moments (means and  
 379 standard deviations) of  $y_t$  and  $y'_t$ , respectively. Root mean squared error (RMSE) is the square  
 380 root of the mean of the square of all of the error between the predicted and observed values.

381 NRR (DeChant and Moradkhani, 2012) is calculated to measure the ensemble spread and assess  
 382 how confidently the ensemble mean is statistically distinguishable from the ensemble spread.  
 383 Reliability (Renard et al., 2010) is a measure of the fit of the Q-Q quantile plot to a uniform. A  
 384 value of 1 is exactly uniform and a value of 0 is the farthest possibility from uniform. For the  
 385 description of the  $z_t$  and  $U_t$  calculation, we refer the readers to Renard et al. (2010).



386 The above four performance measures assess the dynamic behavior of DA-hydrodynamic  
 387 modeling framework at two specific points. Moreover, to spatially evaluate the behavior of the  
 388 proposed framework, we compare the maximum probabilistic flood inundation maps (union of  
 389 probabilistic maps over the simulation period) with the observed floodplain map delineated  
 390 aftermath of Harvey. The Receiver Operating Characteristic (ROC) graph is a common tool for  
 391 validating probabilistic classifiers (Fawcett, 2006). Consider a deterministic flood map as a binary  
 392 map where one and zero represent flooded and non-flooded cells, respectively. First, a threshold  
 393 in the range of [0,1] is used to convert the probabilistic map to a binary deterministic map. This  
 394 means all cells with the probability of inundation less than a given threshold are converted to zero  
 395 and other cells are set to one. The binary map is compared with the reference map and the rate of  
 396 true positive (rtp) and false positive (rfp) are calculated using Equations 7 and 8 (Jafarzadegan and  
 397 Merwade, 2017):

$$398 \quad rtp = \frac{\text{True positive instances}}{\text{total positives}} \quad (7)$$

$$399 \quad rfp = \frac{\text{False positive instances}}{\text{total negative}} \quad (8)$$

400 where true and false positive instances represent the total number of flooded cells in the reference  
 401 map that are predicted as flood and non-flooded cells, respectively. Total positives and negatives  
 402 are total flooded and non-flooded cells in the reference map. This process is repeated and a set of  
 403 points (rfp,rtp) are generated corresponding to different thresholds. The ROC graph connects the  
 404 points in the rfp-rtp space and the area under the curve (AUC) represents the performance of the  
 405 probabilistic classifier (Fawcett, 2006). In this study, we use AUC to compare the performance of  
 406 OL simulation with the EnKF for probabilistic flood inundation mapping. In addition, we calculate

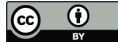

the Underprediction and Overprediction Flood Indices (UFI and OFI) introduced by Jafarzadegan et al., (2018) for comparing probabilistic flood maps against deterministic reference maps:

$$UFI = \frac{\sum_{i=1}^N (1-P_i)}{N} \times 100 \quad i \in F \quad (9)$$

$$OFI = \frac{\sum_{j=1}^M (P_j)}{M} \times 100 \quad j \in NF \quad (10)$$

where F and NF denote the flooded and non-flooded regions in the reference map, and i and j are indicators of cells located within these regions. N and M are the total number of cells in the F and NF regions and  $P_i$ ,  $P_j$  denote the probability of inundation for cells i and j derived from the probabilistic flood maps.

## 4. Results

### 4.1 Synthetic Case Study

We conduct the synthetic experiment to ensure the usefulness and effectiveness of the proposed DA-hydrodynamic modeling framework. Figure 3 presents uncertainty bound evolution of the parameters in the LISFLOOD-FP model (i.e., channel roughness and bathymetry) for 45 days assimilation of synthetic observations (i.e., discharge at gauges 1 and 2 and water stage at gauge 2). The shaded areas correspond to 95, 75, 68, and 10 percentile predictive intervals, and the black stars at the end of each parameter subplot represent the true parameter values. As seen both parameters converge smoothly to the certain region in parameter space where the uncertainty bounds stabilize. While the uncertainty bound associated with the bathymetry becomes stabilized at the early stage of the assimilation process, for the channel roughness, the uncertainty bound gets stabilized toward the end of the assimilation period. It is also evident from Figure 3 that the

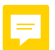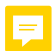

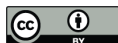

427 bathymetry is a **more identifiable parameter** as it shows the fastest convergence with a minimum  
428 degree of uncertainty. However, the channel roughness is **less identifiable** with the slowest  
429 convergence. ~~The scatter plots illustrate the evolution of parameter space at six different time~~  
430 ~~segments.~~ The first day (t=1) includes all 100 ensemble members of parameters and day 30  
431 corresponds to the highest discharge and water stage of flooding when the model parameters reach  
432 the highest improvement and **get** closer to the true value. Figure 3 shows that both model  
433 parameters are converging toward the true values as the assimilation proceeds. This indicates the  
434 efficacy and usefulness of the proposed DA-hydrodynamic modeling framework developed in this  
435 study.

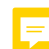

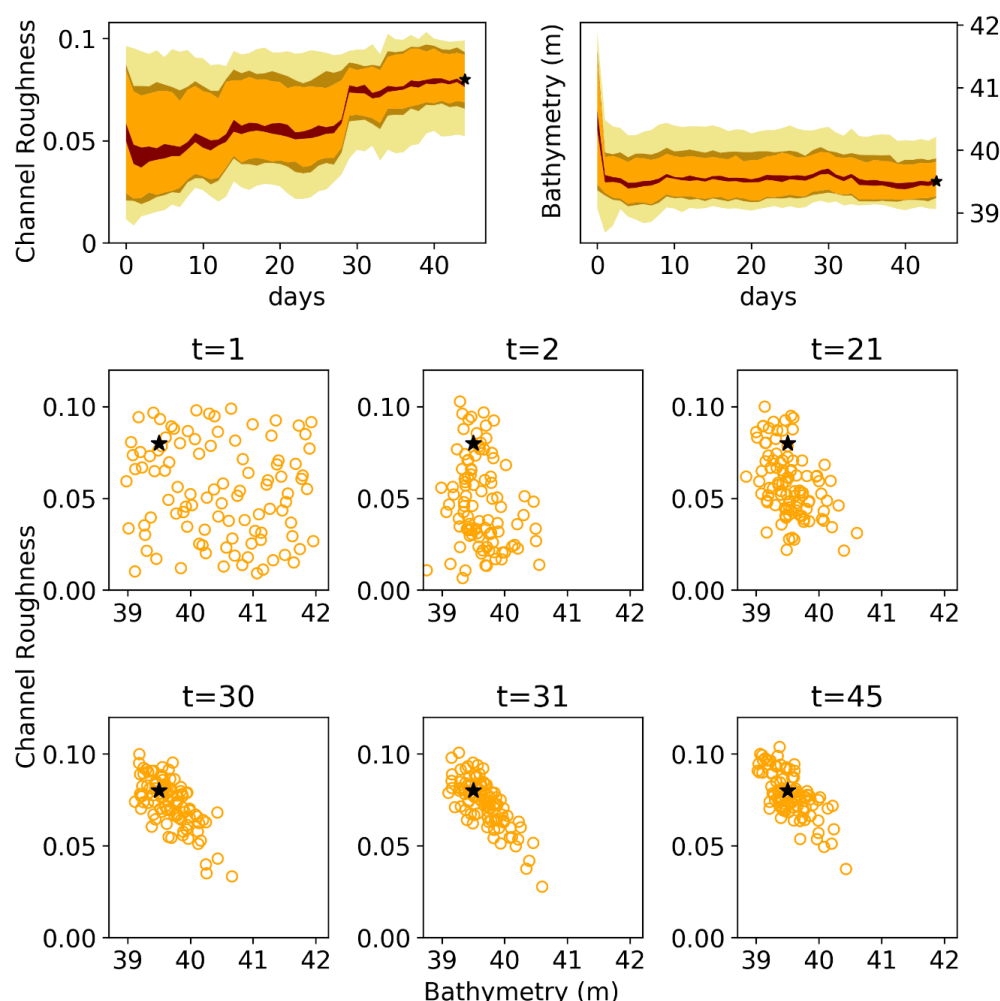

436

437 *Figure 3. Temporal evolution of the LISFLOOD parameters for the synthetic experiment during*  
 438 *Hurricane Harvey using the EnKF. (a) Temporal evolution of model parameter predictive*  
 439 *intervals corresponding to 95, 75, 68, and 10 percentile (b) Temporal evolution of particle*  
 440 *positions in the model parameter space at six different days during the Hurricane.*

## 441 4.2 Real Case Study

442 In the real experiment, we assimilate the discharge and water stage readings from two ~~internal~~  
 443 USGS gauges into the LISFLOOD-FP model. We also run the OL simulation and calculate the  
 444 ensemble mean to predict the discharge and water stage at these two gauges. Figure 4 presents a



comparison of simulated discharge (Figures 4a, 4b) and water stage (Figures 4c, 4d) with observations using both OL and our EnKF-based approach. Figures 4a and 4c are the prior estimates of discharge and water stage, while Figures 4b and 4d show their posteriors, which reflect the updated variables after assimilating the observations into the model. It is worth mentioning that although priors represent the results before assimilating new observations into the model, their values are dependent on the initial conditions updated from observations in the previous time step. In this study, since forecasting (1-day lead time) is the main objective of DA-hydrodynamic modeling framework, we specifically focus on behavior of priors. As can be seen, the simulated peak discharge by the OL is highly overestimated by around 200 cms while assimilating the observations improve the results so that their difference with observation is less than 50 cms at the peak of the flood (KGE =0.76 and RMSE=40.9 cms). In contrast, the simulated water stage in Figures 4c and 4d are underestimated by OL by around 2 meters at the peak. Using the developed approach raises the peak of water stage at peak and reduces the errors significantly (KGE=0.96 and RMSE=0.5). The accurate estimates of prior discharge and water stage confirm the applicability of the proposed assimilation framework in forecast mode when real-time flood warning and decision making is the priority. The NRR measure for the prior discharge and water stage are 1.17 and 0.65 showing that the uncertainty bound is underestimated and overestimated, respectively. The reliability of both variables is above 70 percent since the uncertainty bounds encompass the observations for almost the entire simulation period.

464



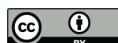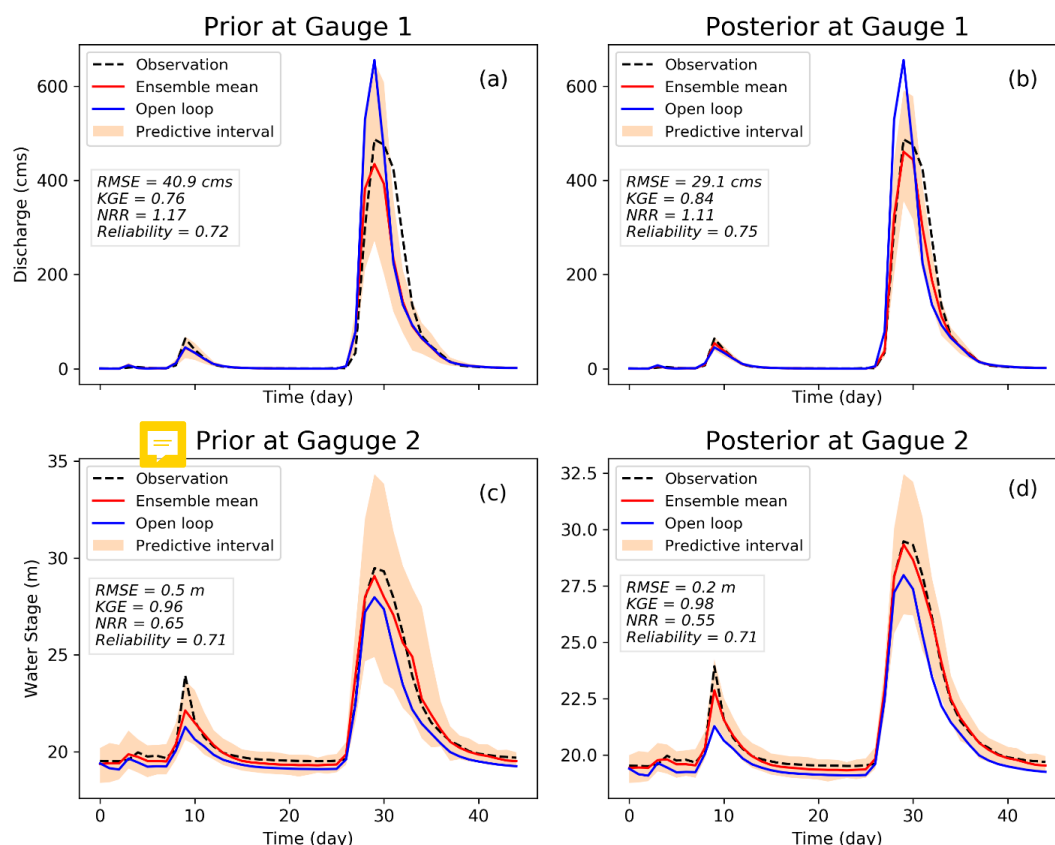

465

466 *Figure 4 Simulation results of LISFLOOD-FP for the real experiment during Hurricane Harvey*  
 467 *using the EnKF and open-loop. (a) Prior simulated discharge at gauge 1 (b) Posterior simulated*  
 468 *discharge at gauge 1 (c) Prior simulated water stage at gauge 2 (d) Posterior simulated water*  
 469 *stage at gauge 2. The shaded areas represent the predictive interval of simulated discharge and*  
 470 *water stage by EnKF.*

471 Figure 5 illustrates the prior and posterior distributions of discharge and water stage in the  
 472 beginning, peak, and ending days of Hurricane Harvey flood. In all three days, the uncertainty  
 473 bounds of both discharge and water stage are narrowed down by assimilating the observations so  
 474 that posterior distributions are more precise compared to the priors. In the beginning and ending  
 475 days (Aug 26 and Sep 1), the mean of prior distributions is substantially shifted toward truth in the  
 476 posterior distributions. Figure 5 reveals that our developed approach provides more accurate and

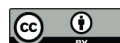

reliable posterior discharge and water stage distributions compared to prior distributions where the simulations are either overestimated or underestimated. It is noted that, on August 28 (day of flood peak), although the prior distributions accurately represent the observation, they have wide uncertainty bound. After correcting/updating the model state variables and parameters, as posterior distributions show, the uncertainty bound is reduced while the ensemble mean remains closer to the observation.

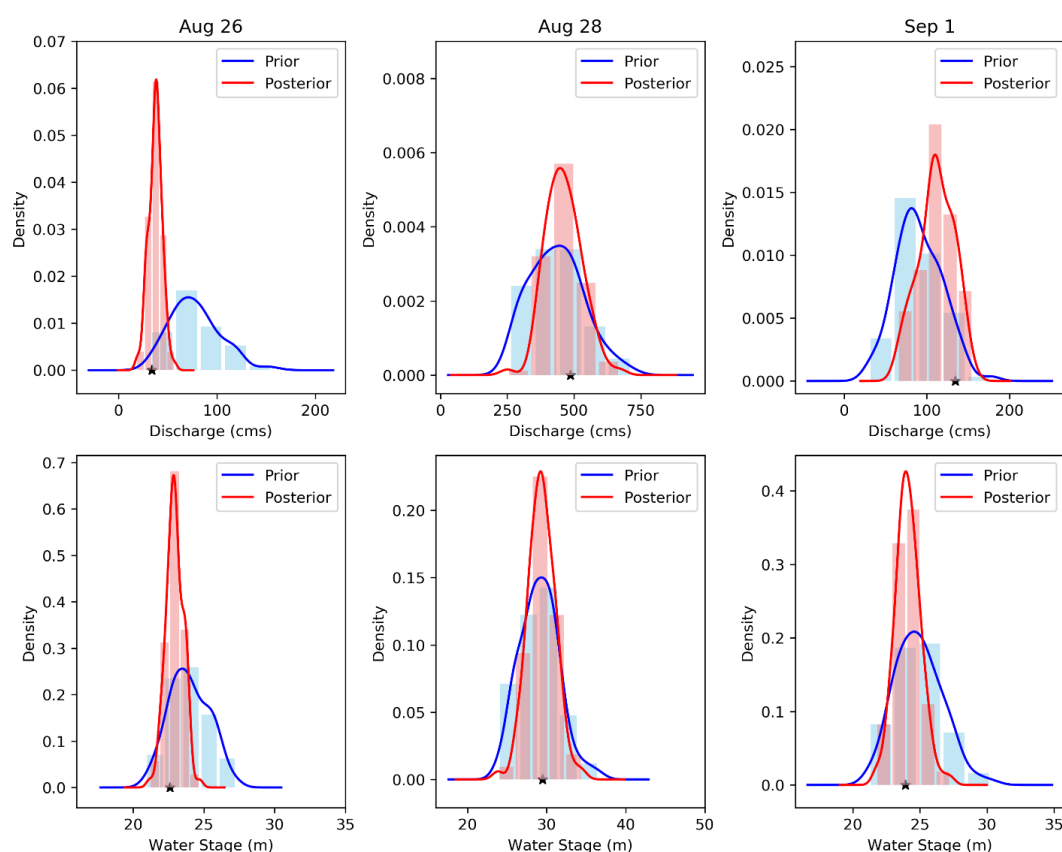

483

484 *Figure 5. Prior and posterior distribution of discharge (a,b,c) and water stage (c,d,f) at the*  
 485 *beginning (Aug 26), peak (Aug 28), and ending (Sep1) days of Hurricane Harvey using the*  
 486 *EnKF*

487

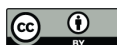

### 488 4.3 Probabilistic Flood Inundation Mapping

489 In this ~~study~~, we ~~propose a DA-hydrodynamic modeling framework to~~ account for the  
490 uncertainties involved in flood modeling and generate real-time probabilistic flood inundation  
491 maps. Since the majority of flooding conditions occurred within 6 days from August 27-Sep 1, we  
492 display the spatial distribution of water depth in this period and provide probabilistic flood  
493 inundation maps using both OL and our developed approach (~~see~~ Figures 6 and 7). Figure 6  
494 represents the first three days of Harvey, which corresponds to the upper limb of the flood  
495 hydrograph. On August 27, the major difference between the OL and EnKF appears in the regions  
496 around the upstream of the lower channel where the EnKF provides a more reliable inundated area.  
497 Moving toward the peak of flood on Aug 29, the OL generates a large region of uncertain cells  
498 around the banks of the upper channel, while both the extent and density of uncertain values in the  
499 probabilistic maps generated by the EnKF is smaller during the peak of Harvey.

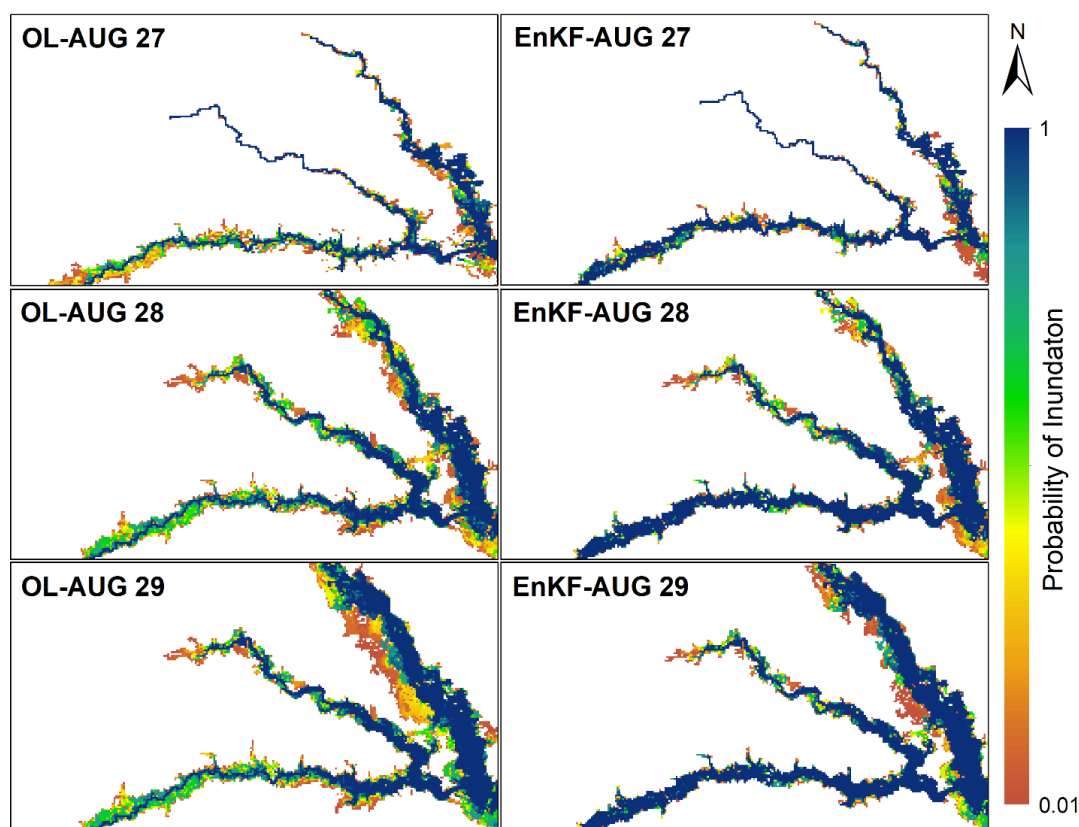

500

501 *Figure 6 Probabilistic flood inundation maps generated by OL and EnKF techniques to simulate*  
 502 *the upper limb of Harvey flood hydrograph from Aug 27 to Aug 29.*

503 Figure 7 shows the probabilistic inundation areas in the last three days corresponding to the lower  
 504 limb of the flood hydrograph. ~~In this figure,~~ the discrepancies between the OL and EnKF flood  
 505 maps increase showing that performing DA is more effective in improving the inundation mapping  
 506 skill from peak to ending point of the flood hydrograph. A large number of inundated cells  
 507 generated by the OL are vanished after the peak of Harvey which results in a set of scattered  
 508 discontinuous maps in Aug 31 and Sep 1. On the other hand, the probabilistic maps generated by  
 509 the EnKF maintain their continuous shapes so that the probability of inundation is reduced without  
 510 changing the extent. The merit of the EnKF in improving the flood inundation areas at the lower



limb of the flood hydrograph agrees with results in Figures 4c and 4d where the EnKF widens the simulated water stage hydrographs and removes the lag difference that exists between the open loop and observations.

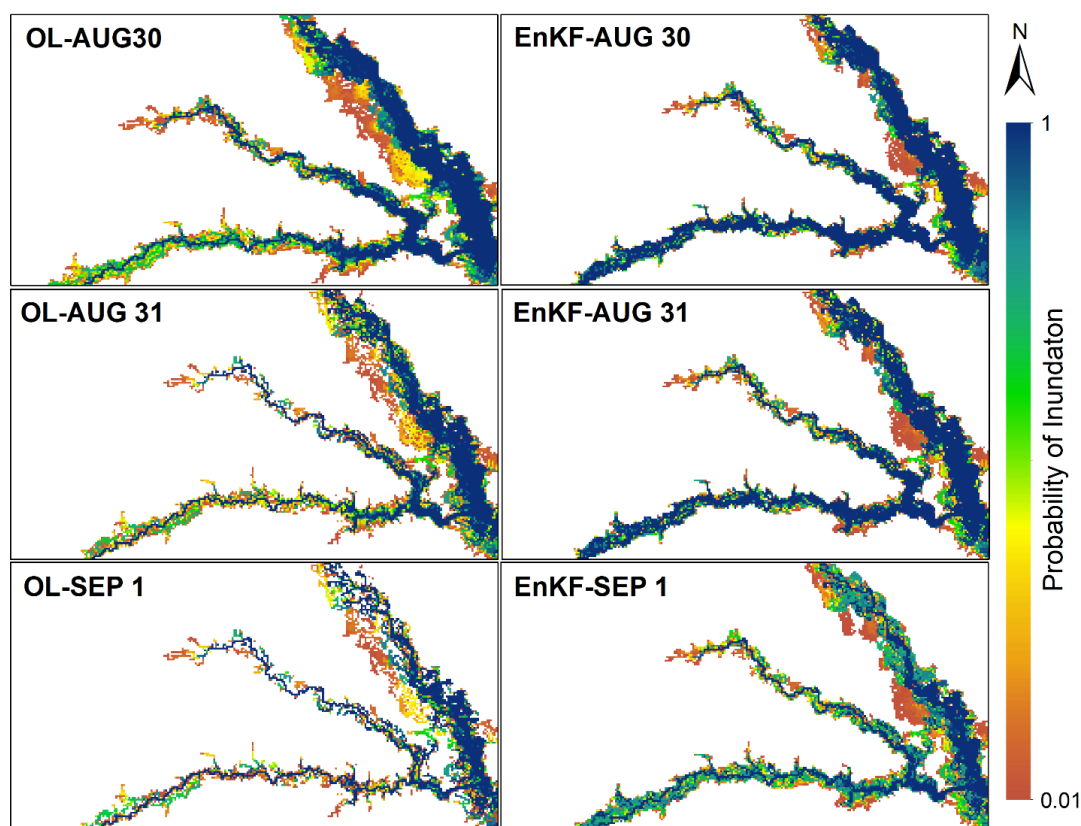

514

Figure 7 Probabilistic flood inundation maps generated by OL and EnKF techniques to simulate the lower limb of Harvey flood hydrograph from Aug 30 to Sep 1.

Finally, to quantify the performance of EnKF and OL for generating a spatial distribution of water depth over the domain, we illustrate the ROC graphs, the AUC values, and Fit indices in Figure 8. To calculate these measures, we ignore the temporal distributions and only report the maximum inundation maps that represent the union of flooded areas over the entire period of Harvey. Comparing the EnKF and OL in Figure 8.a, the EnKF line (blue) is closer to the northwest of the

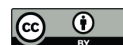

522 rfp-rtp space where its AUC is 5% higher than the OL approach. In Figure 8.b, each point  
 523 represents the Fit indices for the OL and the EnKF approaches corresponding to a given threshold.  
 524 Using hundred number of thresholds that each ranging from [0.01,1], the probabilistic maps are  
 525 converted to 100 deterministic maps and the Fit indices are calculated. The position of scatters  
 526 above the dash line confirms the EnKF outperforms the OL. In addition to these measures, the  
 527 [UFI, OFI] indices calculated for OL and EnKF approaches are [30.3, 0.26] %, and [23.4, 0.4] %  
 528 respectively. The low values of OFI for both approaches ( $< 1\%$ ) show that the simulations mostly  
 529 underestimate the flood inundation areas. In addition, comparing the indices of both approaches  
 530 reveal that the EnKF reduces the overall underestimation by around 7%.

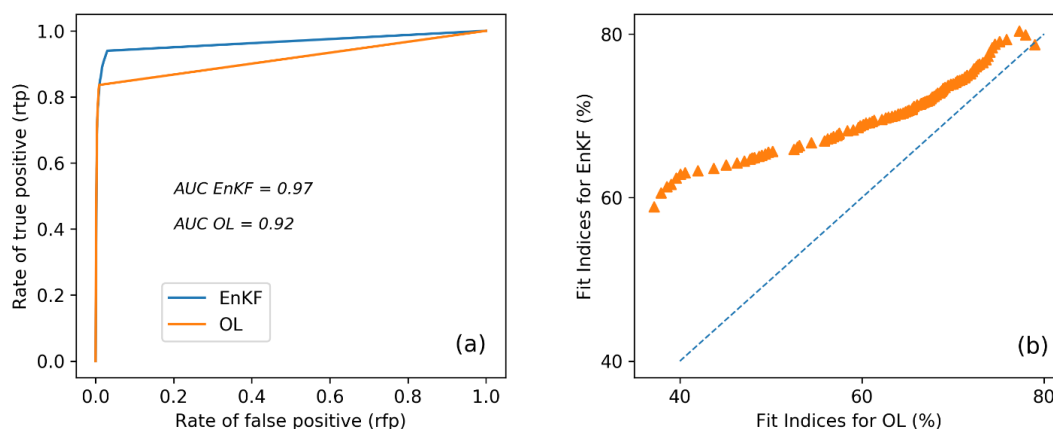

531

532 *Figure 8 The Receiver Operating Curves (ROC) indicating the performance of OL and EnKF*  
 533 *techniques for probabilistic flood inundation mapping*

## 534 5. Discussion and Conclusions

535 The main motivation in this study is to propose a DA-hydrodynamic modeling framework for real-  
 536 time probabilistic flood inundation mapping. Considering the coarse spatiotemporal resolution of  
 537 satellite data for capturing the water surface elevation, assimilating them into the hydrodynamic



538 models may not be a practical solution for an upcoming flood event. On the other hand, the  
539 availability of daily discharge and ~~water surface elevation~~ data at gauge stations is a great  
540 opportunity to establish a multivariate DA-hydrodynamic modeling framework that updates the  
541 initial condition of modeling at ~~daily~~ scale and forecast the flood inundation areas at 1 day lead  
542 time. Here, we used the EnKF data assimilation method in conjunction with a hydrodynamic  
543 model to account for different sources of uncertainties involved in different layers of model  
544 simulations, including the boundary conditions, model parameters, and initial condition, and  
545 generate real-time probabilistic flood inundation maps. To further enhance the performance of the  
546 developed framework, the discharge and water stage at two different gauges are simultaneously  
547 assimilated into the LISFLOOD-FP model. The multivariate EnKF approach considers the  
548 correlation between discharge at two gauges and between discharge and ~~water surface elevation~~  
549 one gauge using a modified covariance matrix and Kalman gain equation.

550 In the synthetic experiment, we examined the convergence of model parameters toward truth and  
551 found that the proposed DA-hydrodynamic modeling framework can be successfully used to  
552 improve the accuracy and reliability of model predictions while accounting for uncertainties  
553 associated with model parameters. The channel roughness coefficient varied more rapidly than  
554 the bathymetry during the temporal evolutions of these parameters showing the better  
555 identifiability of this parameter. The validation results of the real experiment revealed that the  
556 assimilation with the EnKF approach improves the model predictions ~~at~~ across temporal and  
557 spatial scales (i.e., discharge and water stage time series at gauges and flood maps showing the  
558 maximum water depth over the simulation period). These improvements are more pronounced  
559 during the falling limb of the flood hydrograph where the EnKF widens the simulated hydrograph  
560 and removes the existing lag compared to the observations. Similarly, the simulated flood

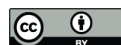

561 inundation maps confirm that the OL provides discontinuous scattered maps during the flood  
562 recession period while the EnKF provides a more accurate representation of the inundation areas.  
563 The validation results also demonstrate that the EnKF reduces the underestimation by 7% and  
564 outperformed the OL approach by around 5% for probabilistic flood inundation mapping.

565 To simulate flood hazards during the emergency of an upcoming flood event, using an efficient  
566 flood modeling framework is of paramount importance. However, a simplified model setup (i.e.  
567 using coarse resolution DEM, assuming uniform roughness coefficient for channel and floodplain,  
568 estimating bathymetry by lowering DEM with one parameter) for efficient flood modeling is prone  
569 to losing accuracy. Particularly, for an extreme flooding condition such as Hurricane Harvey, the  
570 simplified modeling may pose significant errors. The results obtained from the simulation of the  
571 real experiment demonstrated that despite using a simplified efficient modeling setup, we can still  
572 simulate the discharge, water stage, and inundation areas for an extreme flood event with  
573 acceptable accuracy while accounting for uncertainties involved in model predictions. This shows  
574 that assimilating the gauge data into a simplified model setup improves the accuracy, and provides  
575 an efficient probabilistic framework for real-time flood inundation mapping that considers  
576 potential sources of uncertainties in different layers of modeling.

577 The time dependency that exists between the upstream and downstream gauges along a channel  
578 can affect the performance of multivariate assimilation with those gauges. For future studies, using  
579 a more advanced DA technique that fully characterizes the model structural uncertainty  
580 (Abbaszadeh et al., 2019), and considering the time lag dependency between multiple gauges can  
581 improve the performance of modeling and provide more realistic assimilation of the hydrodynamic  
582 models. Finally, proposing a DA-hydrodynamic modeling framework that considers the DEM and





583 channel width uncertainty can provide a more comprehensive uncertainty quantification for  
584 probabilistic flood inundation mapping in future studies.

### 585 **Data availability**

586 All the data used in this study, including the gauge streamflow and water stage data and the DEMs,  
587 are publicly available from the USGS website and National Elevation Dataset (NED). The  
588 reference flood maps provided for Hurricane Harvey is available from the USGS report at  
589 <https://pubs.usgs.gov/sir/2018/5070/sir20185070.pdf>.

### 590 **Author contribution**

591 KJ and PA designed the synthetic and real experiments. KJ developed, set up, evaluated and  
592 implemented the DA-hydrodynamic modeling framework for both experiments. PA provided  
593 inputs on the assimilation part. KJ wrote the first draft of the manuscript, HR and PA edited the  
594 manuscript.

### 595 **Competing interests**

596 The authors declare that they have no conflict of interest.

### 597 **Acknowledgment**

598 Partial financial support for this study was provided by the USACE contract #W912HZ2020055.  
599 We would like to thank the anonymous reviewers for their constructive comments on the original  
600 version of the manuscript.

601

602



## 603 References

- 604 Abbaszadeh, P., Gavahi, K., Moradkhani, H., 2020. Multivariate remotely sensed and in-situ data  
 605 assimilation for enhancing community WRF-Hydro model forecasting. *Adv. Water*  
 606 *Resour.* 145, 103721.
- 607 Abbaszadeh, P., Moradkhani, H., Daescu, D.N., 2019. The Quest for Model Uncertainty  
 608 Quantification: A Hybrid Ensemble and Variational Data Assimilation Framework.  
 609 *Water Resour. Res.* 55, 2407–2431. <https://doi.org/10.1029/2018WR023629>
- 610 Abbaszadeh, P., Moradkhani, H., Yan, H., 2018. Enhancing hydrologic data assimilation by  
 611 evolutionary Particle Filter and Markov Chain Monte Carlo. *Adv. Water Resour.* 111,  
 612 192–204. <https://doi.org/10.1016/j.advwatres.2017.11.011>
- 613 Alemohammad, S.H., McLaughlin, D.B., Entekhabi, D., 2015. Quantifying precipitation  
 614 uncertainty for land data assimilation applications. *Mon. Weather Rev.* 143, 3276–3299.
- 615 Anderson, J.L., Anderson, S.L., 1999. A Monte Carlo implementation of the nonlinear filtering  
 616 problem to produce ensemble assimilations and forecasts. *Mon. Weather Rev.* 127, 2741–  
 617 2758.
- 618 Aronica, G., Bates, P.D., Horritt, M.S., 2002a. Assessing the uncertainty in distributed model  
 619 predictions using observed binary pattern information within GLUE. *Hydrol. Process.* 16,  
 620 2001–2016. <https://doi.org/10.1002/hyp.398>
- 621 Aronica, G., Bates, P.D., Horritt, M.S., 2002b. Assessing the uncertainty in distributed model  
 622 predictions using observed binary pattern information within GLUE. *Hydrol. Process.* 16,  
 623 2001–2016. <https://doi.org/10.1002/hyp.398>
- 624 Azimi, S., Dariane, A.B., Modanesi, S., Bauer-Marschallinger, B., Bindlish, R., Wagner, W.,  
 625 Massari, C., 2020. Assimilation of Sentinel 1 and SMAP-based satellite soil moisture  
 626 retrievals into SWAT hydrological model: The impact of satellite revisit time and product  
 627 spatial resolution on flood simulations in small basins. *J. Hydrol.* 581, 124367.
- 628 Baldassarre, G.D., Schumann, G., Bates, P., 2009. Near real time satellite imagery to support and  
 629 verify timely flood modelling. *Hydrol. Process.* 23, 799–803.  
 630 <https://doi.org/10.1002/hyp.7229>
- 631 Bales, J.D., Wagner, C.R., 2009. Sources of uncertainty in flood inundation maps. *J. Flood Risk*  
 632 *Manag.* 2, 139–147. <https://doi.org/10.1111/j.1753-318X.2009.01029.x>
- 633 Bates, P.D., De Roo, A.P.J., 2000. A simple raster-based model for flood inundation simulation.  
 634 *J. Hydrol.* 236, 54–77. [https://doi.org/10.1016/S0022-1694\(00\)00278-X](https://doi.org/10.1016/S0022-1694(00)00278-X)
- 635 Brêda, J.P.L.F., Paiva, R.C.D., Bravo, J.M., Passaia, O.A., Moreira, D.M., 2019. Assimilation of  
 636 Satellite Altimetry Data for Effective River Bathymetry. *Water Resour. Res.* 55, 7441–  
 637 7463. <https://doi.org/10.1029/2018WR024010>
- 638 Clark, M.P., Hay, L.E., 2004. Use of Medium-Range Numerical Weather Prediction Model  
 639 Output to Produce Forecasts of Streamflow. *J. Hydrometeorol.* 5, 15–32.  
 640 [https://doi.org/10.1175/1525-7541\(2004\)005<0015:UOMNWP>2.0.CO;2](https://doi.org/10.1175/1525-7541(2004)005<0015:UOMNWP>2.0.CO;2)



- 641 Courtier, P., Derber, J., Errico, R.O.N., Louis, J.-F., VukićEvić, T., 1993. Important literature  
 642 on the use of adjoint, variational methods and the Kalman filter in meteorology. *Tellus*  
 643 *Dyn. Meteorol. Oceanogr.* 45, 342–357.
- 644 Cuo, L., Pagano, T.C., Wang, Q.J., 2011. A Review of Quantitative Precipitation Forecasts and  
 645 Their Use in Short- to Medium-Range Streamflow Forecasting. *J. Hydrometeorol.* 12,  
 646 713–728. <https://doi.org/10.1175/2011JHM1347.1>
- 647 DeChant, C.M., Moradkhani, H., 2014. Toward a reliable prediction of seasonal forecast  
 648 uncertainty: Addressing model and initial condition uncertainty with ensemble data  
 649 assimilation and sequential Bayesian combination. *J. Hydrol.* 519, 2967–2977.
- 650 Di Baldassarre, G., Schumann, G., Bates, P.D., 2009. A technique for the calibration of hydraulic  
 651 models using uncertain satellite observations of flood extent. *J. Hydrol.* 367, 276–282.  
 652 <https://doi.org/10.1016/j.jhydrol.2009.01.020>
- 653 Domeneghetti, A., Vorogushyn, S., Castellarin, A., Merz, B., Brath, A., 2013. Probabilistic flood  
 654 hazard mapping: effects of uncertain boundary conditions. *Hydrol. Earth Syst. Sci.* 17,  
 655 3127–3140.
- 656 Durand, M., Andreadis, K.M., Alsdorf, D.E., Lettenmaier, D.P., Moller, D., Wilson, M., 2008.  
 657 Estimation of bathymetric depth and slope from data assimilation of swath altimetry into  
 658 a hydrodynamic model. *Geophys. Res. Lett.* 35.
- 659 Fawcett, T., 2006. An introduction to ROC analysis. *Pattern Recognit. Lett.*, ROC Analysis in  
 660 *Pattern Recognition* 27, 861–874. <https://doi.org/10.1016/j.patrec.2005.10.010>
- 661 García-Pintado, J., Neal, J.C., Mason, D.C., Dance, S.L., Bates, P.D., 2013. Scheduling satellite-  
 662 based SAR acquisition for sequential assimilation of water level observations into flood  
 663 modelling. *J. Hydrol.* 495, 252–266. <https://doi.org/10.1016/j.jhydrol.2013.03.050>
- 664 Giustarini, L., Matgen, P., Hostache, R., Montanari, M., Plaza Guingla, D.A., Pauwels, V., De  
 665 Lannoy, G., De Keyser, R., Pfister, L., Hoffmann, L., 2011. Assimilating SAR-derived  
 666 water level data into a hydraulic model: a case study. *Hydrol. Earth Syst. Sci.* 15, 2349–  
 667 2365.
- 668 Gobeyn, S., Van Wesemael, A., Neal, J., Lievens, H., Eerdenbrugh, K.V., De Vleeschouwer, N.,  
 669 Vernieuwe, H., Schumann, G.J.-P., Di Baldassarre, G., Baets, B.D., Bates, P.D.,  
 670 Verhoest, N.E.C., 2017. Impact of the timing of a SAR image acquisition on the  
 671 calibration of a flood inundation model. *Adv. Water Resour.* 100, 126–138.  
 672 <https://doi.org/10.1016/j.advwatres.2016.12.005>
- 673 Habets, F., LeMoigne, P., Noilhan, J., 2004. On the utility of operational precipitation forecasts  
 674 to served as input for streamflow forecasting. *J. Hydrol.* 293, 270–288.  
 675 <https://doi.org/10.1016/j.jhydrol.2004.02.004>
- 676 Hall, J.W., Tarantola, S., Bates, P.D., Horritt, M.S., 2005. Distributed Sensitivity Analysis of  
 677 Flood Inundation Model Calibration. *J. Hydraul. Eng.* 131, 117–126.  
 678 [https://doi.org/10.1061/\(ASCE\)0733-9429\(2005\)131:2\(117\)](https://doi.org/10.1061/(ASCE)0733-9429(2005)131:2(117))
- 679 Horritt, M.S., 2006. A methodology for the validation of uncertain flood inundation models. *J.*  
 680 *Hydrol.* 326, 153–165. <https://doi.org/10.1016/j.jhydrol.2005.10.027>



- Hostache, R., Chini, M., Giustarini, L., Neal, J., Kavetski, D., Wood, M., Corato, G., Pelich, R.-  
 M., Matgen, P., 2018. Near-Real-Time Assimilation of SAR-Derived Flood Maps for  
 Improving Flood Forecasts. *Water Resour. Res.* 54, 5516–5535.  
<https://doi.org/10.1029/2017WR022205>
- Hostache, R., Lai, X., Monnier, J., Puech, C., 2010. Assimilation of spatially distributed water  
 levels into a shallow-water flood model. Part II: Use of a remote sensing image of Mosel  
 River. *J. Hydrol.* 390, 257–268. <https://doi.org/10.1016/j.jhydrol.2010.07.003>
- Hostache, R., Matgen, P., Schumann, G., Puech, C., Hoffmann, L., Pfister, L., 2009. Water Level  
 Estimation and Reduction of Hydraulic Model Calibration Uncertainties Using Satellite  
 SAR Images of Floods. *IEEE Trans. Geosci. Remote Sens.* 47, 431–441.  
<https://doi.org/10.1109/TGRS.2008.2008718>
- Hunter, N.M., Bates, P.D., Horritt, M.S., De Roo, A.P.J., Werner, M.G.F., 2005. Utility of  
 different data types for calibrating flood inundation models within a GLUE framework.  
*Hydrol. Earth Syst. Sci. Discuss.* 9, 412–430.
- Jafarzadegan, K., Merwade, V., 2017. A DEM-based approach for large-scale floodplain  
 mapping in ungauged watersheds. *J. Hydrol.* 550, 650–662.  
<https://doi.org/10.1016/j.jhydrol.2017.04.053>
- Jafarzadegan, K., Merwade, V., Saksena, S., 2018. A geomorphic approach to 100-year  
 floodplain mapping for the Conterminous United States. *J. Hydrol.* 561, 43–58.  
<https://doi.org/10.1016/j.jhydrol.2018.03.061>
- Kumar, S.V., Dong, J., Peters-Lidard, C.D., Mocko, D., Gómez, B., 2017. Role of forcing  
 uncertainty and background model error characterization in snow data assimilation.  
*Hydrol. Earth Syst. Sci.* 21, 2637–2647.
- Lai, X., Liang, Q., Yesou, H., Daillet, S., 2014. Variational assimilation of remotely sensed flood  
 extents using a 2-D flood model. *Hydrol. Earth Syst. Sci.* 18.
- Leach, J.M., Kornelsen, K.C., Coulibaly, P., 2018. Assimilation of near-real time data products  
 into models of an urban basin. *J. Hydrol.* 563, 51–64.
- Lee, H., Seo, D.-J., Koren, V., 2011. Assimilation of streamflow and in situ soil moisture data  
 into operational distributed hydrologic models: Effects of uncertainties in the data and  
 initial model soil moisture states. *Adv. Water Resour.* 34, 1597–1615.
- Lievens, H., Reichle, R.H., Liu, Q., De Lannoy, G.J., Dunbar, R.S., Kim, S.B., Das, N.N., Cosh,  
 M., Walker, J.P., Wagner, W., 2017. Joint Sentinel-1 and SMAP data assimilation to  
 improve soil moisture estimates. *Geophys. Res. Lett.* 44, 6145–6153.
- Maidment, D.R., 2017. Conceptual Framework for the National Flood Interoperability  
 Experiment. *JAWRA J. Am. Water Resour. Assoc.* 53, 245–257.  
<https://doi.org/10.1111/1752-1688.12474>
- Mason, D.C., Bates, P.D., Dall’Amico, J.T., 2009. Calibration of uncertain flood inundation  
 models using remotely sensed water levels. *J. Hydrol.* 368, 224–236.
- Matgen, P., Montanari, M., Hostache, R., Pfister, L., Hoffmann, L., Plaza, D., Pauwels, V.R.N.,  
 De Lannoy, G., De Keyser, R., Savenije, H.H.G., 2010a. Towards the sequential



- 721 assimilation of SAR-derived water stages into hydraulic models using the Particle Filter:  
 722 proof of concept. *Hydrol. Earth Syst. Sci.* 14, 1773–1785.
- 723 Matgen, P., Montanari, M., Hostache, R., Pfister, L., Hoffmann, L., Plaza, D., Pauwels, V.R.N.,  
 724 De Lannoy, G., De Keyser, R., Savenije, H.H.G., 2010b. Towards the sequential  
 725 assimilation of SAR-derived water stages into hydraulic models using the Particle Filter:  
 726 proof of concept. *Hydrol. Earth Syst. Sci.* 14, 1773–1785.
- 727 Merwade, V., Cook, A., Coonrod, J., 2008. GIS techniques for creating river terrain models for  
 728 hydrodynamic modeling and flood inundation mapping. *Environ. Model. Softw.* 23,  
 729 1300–1311. <https://doi.org/10.1016/j.envsoft.2008.03.005>
- 730 Moradkhani, H., Hsu, K.-L., Gupta, H., Sorooshian, S., 2005a. Uncertainty assessment of  
 731 hydrologic model states and parameters: Sequential data assimilation using the particle  
 732 filter. *Water Resour. Res.* 41.
- 733 Moradkhani, H., Nearing, G.S., Abbaszadeh, P., Pathiraja, S., 2019. Fundamentals of data  
 734 assimilation and theoretical advances. *Handb. Hydrometeorol. Ensemble Forecast.*  
 735 Springer Berl. Heidelb. Berl. Heidelb. 675–699.
- 736 Moradkhani, H., Sorooshian, S., Gupta, H.V., Houser, P.R., 2005b. Dual state–parameter  
 737 estimation of hydrological models using ensemble Kalman filter. *Adv. Water Resour.* 28,  
 738 135–147. <https://doi.org/10.1016/j.advwatres.2004.09.002>
- 739 Munier, S., Polebistki, A., Brown, C., Belaud, G., Lettenmaier, D.P., 2015. SWOT data  
 740 assimilation for operational reservoir management on the upper Niger River Basin. *Water*  
 741 *Resour. Res.* 51, 554–575. <https://doi.org/10.1002/2014WR016157>
- 742 Neal, J., Keef, C., Bates, P., Beven, K., Leedal, D., 2013. Probabilistic flood risk mapping  
 743 including spatial dependence. *Hydrol. Process.* 27, 1349–1363.  
 744 <https://doi.org/10.1002/hyp.9572>
- 745 Neal, J., Schumann, G., Bates, P., 2012. A subgrid channel model for simulating river hydraulics  
 746 and floodplain inundation over large and data sparse areas. *Water Resour. Res.* 48.  
 747 <https://doi.org/10.1029/2012WR012514>
- 748 Neal, J., Schumann, G., Bates, P., Buytaert, W., Matgen, P., Pappenberger, F., 2009. A data  
 749 assimilation approach to discharge estimation from space. *Hydrol. Process.* 23, 3641–  
 750 3649. <https://doi.org/10.1002/hyp.7518>
- 751 Pappenberger, F., Beven, K.J., Ratto, M., Matgen, P., 2008. Multi-method global sensitivity  
 752 analysis of flood inundation models. *Adv. Water Resour.* 31, 1–14.  
 753 <https://doi.org/10.1016/j.advwatres.2007.04.009>
- 754 Pappenberger, F., Frodsham, K., Beven, K., Romanowicz, R., Matgen, P., 2007. Fuzzy set  
 755 approach to calibrating distributed flood inundation models using remote sensing  
 756 observations. *Hydrol. Earth Syst. Sci. Discuss.* 11, 739–752.
- 757 Pathiraja, S., Moradkhani, H., Marshall, L., Sharma, A., Geenens, G., 2018. Data-driven model  
 758 uncertainty estimation in hydrologic data assimilation. *Water Resour. Res.* 54, 1252–  
 759 1280.



- 760 Pauwels, V.R., Hoeben, R., Verhoest, N.E., De Troch, F.P., 2001. The importance of the spatial  
 761 patterns of remotely sensed soil moisture in the improvement of discharge predictions for  
 762 small-scale basins through data assimilation. *J. Hydrol.* 251, 88–102.
- 763 Pedinotti, V., Boone, A., Ricci, S., Biancamaria, S., Mognard, N., 2014. Assimilation of satellite  
 764 data to optimize large-scale hydrological model parameters: a case study for the SWOT  
 765 mission. *Hydrol. Earth Syst. Sci.* 18, 4485–4507. [https://doi.org/10.5194/hess-18-4485-](https://doi.org/10.5194/hess-18-4485-2014)  
 766 2014
- 767 Pedrozo-Acuña, A., Rodríguez-Rincón, J.P., Arganis-Juárez, M., Domínguez-Mora, R.,  
 768 Villareal, F.J.G., 2015. Estimation of probabilistic flood inundation maps for an extreme  
 769 event: Pánuco River, México. *J. Flood Risk Manag.* 8, 177–192.  
 770 <https://doi.org/10.1111/jfr3.12067>
- 771 Pinter, N., Santos, N., Hui, R., 2017. Preliminary analysis of Hurricane Harvey flooding in  
 772 Harris County, Texas. Retrieved UC Davis Cent. Watershed Sci.-Calif. WaterBlog  
 773 [https://californiawaterblog](https://californiawaterblog.com/2017/09/01/preliminary-analysis-of-hurricane-harvey-flooding-in-harris-county-texas/) Com20170901preliminary-Anal.--Hurricaneharvey-Flooding--  
 774 Harris-Cty.-Tex.
- 775 Purvis, M.J., Bates, P.D., Hayes, C.M., 2008. A probabilistic methodology to estimate future  
 776 coastal flood risk due to sea level rise. *Coast. Eng.* 55, 1062–1073.  
 777 <https://doi.org/10.1016/j.coastaleng.2008.04.008>
- 778 Rahman, Md.R., Thakur, P.K., 2018. Detecting, mapping and analysing of flood water  
 779 propagation using synthetic aperture radar (SAR) satellite data and GIS: A case study  
 780 from the Kendrapara District of Orissa State of India. *Egypt. J. Remote Sens. Space Sci.*,  
 781 *EJRS Special Issue: Microwave Remote Sensing in honor of Professor Adel Yehia* 21,  
 782 S37–S41. <https://doi.org/10.1016/j.ejrs.2017.10.002>
- 783 Reichle, R.H., McLaughlin, D.B., Entekhabi, D., 2002. Hydrologic data assimilation with the  
 784 ensemble Kalman filter. *Mon. Weather Rev.* 130, 103–114.
- 785 Renard, B., Kavetski, D., Kuczera, G., Thyer, M., Franks, S.W., 2010. Understanding predictive  
 786 uncertainty in hydrologic modeling: The challenge of identifying input and structural  
 787 errors. *Water Resour. Res.* 46. <https://doi.org/10.1029/2009WR008328>
- 788 Romanowicz, R., Beven, K., 2003. Estimation of flood inundation probabilities as conditioned  
 789 on event inundation maps. *Water Resour. Res.* 39.  
 790 <https://doi.org/10.1029/2001WR001056>
- 791 Sheffield, J., Pan, M., Wood, E.F., Mitchell, K.E., Houser, P.R., Schaake, J.C., Robock, A.,  
 792 Lohmann, D., Cosgrove, B., Duan, Q., Luo, L., Higgins, R.W., Pinker, R.T., Tarpley,  
 793 J.D., Ramsay, B.H., 2003. Snow process modeling in the North American Land Data  
 794 Assimilation System (NLDAS): 1. Evaluation of model-simulated snow cover extent. *J.*  
 795 *Geophys. Res. Atmospheres* 108. <https://doi.org/10.1029/2002JD003274>
- 796 Slater, A.G., Clark, M.P., 2006. Snow data assimilation via an ensemble Kalman filter. *J.*  
 797 *Hydrometeorol.* 7, 478–493.



- 798 Tarpanelli, A., Brocca, L., Melone, F., Moramarco, T., 2013. Hydraulic modelling calibration in  
 799 small rivers by using coarse resolution synthetic aperture radar imagery. *Hydrol. Process.*  
 800 27, 1321–1330. <https://doi.org/10.1002/hyp.9550>
- 801 Teng, J., Jakeman, A.J., Vaze, J., Croke, B.F.W., Dutta, D., Kim, S., 2017. Flood inundation  
 802 modelling: A review of methods, recent advances and uncertainty analysis. *Environ.*  
 803 *Model. Softw.* 90, 201–216. <https://doi.org/10.1016/j.envsoft.2017.01.006>
- 804 Vrugt, J.A., Gupta, H.V., Nualláin, B., Bouten, W., 2006. Real-time data assimilation for  
 805 operational ensemble streamflow forecasting. *J. Hydrometeorol.* 7, 548–565.
- 806 Yoon, Y., Durand, M., Merry, C.J., Clark, E.A., Andreadis, K.M., Alsdorf, D.E., 2012a.  
 807 Estimating river bathymetry from data assimilation of synthetic SWOT measurements. *J.*  
 808 *Hydrol.* 464, 363–375.
- 809 Yoon, Y., Durand, M., Merry, C.J., Clark, E.A., Andreadis, K.M., Alsdorf, D.E., 2012b.  
 810 Estimating river bathymetry from data assimilation of synthetic SWOT measurements. *J.*  
 811 *Hydrol.* 464, 363–375.
- 812 Zhang, Q., Shi, L., Holzman, M., Ye, M., Wang, Y., Carmona, F., Zha, Y., 2019. A dynamic  
 813 data-driven method for dealing with model structural error in soil moisture data  
 814 assimilation. *Adv. Water Resour.* 132, 103407.

815

816

817

818

819

820
